# Supplementary material
Source: PubMed Central journal article supplement (PMC291866)
Supplement: nar_31_24_7099__1.pdf [file nar_31_24_7099__1.pdf]

## Supplementary Material

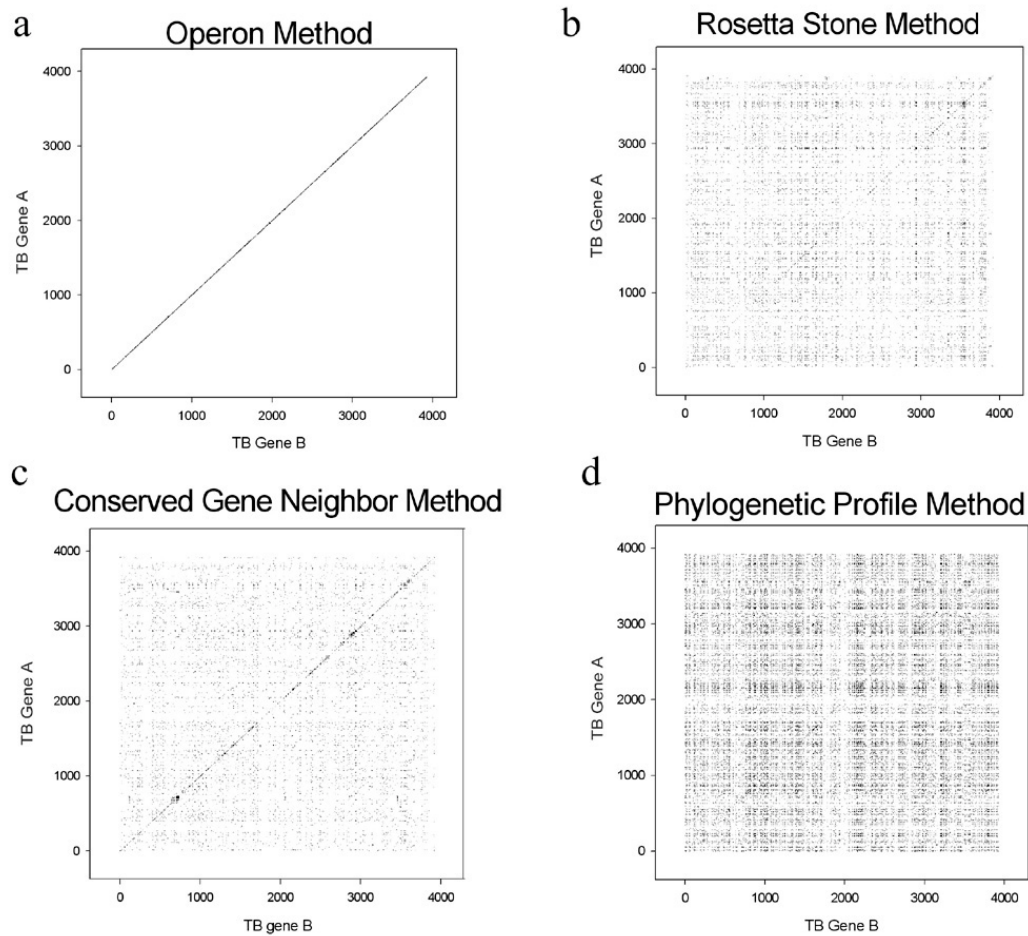

**Supplementary Material Figure 1.** Genome-wide functional linkage maps representing functional linkages inferred by each of the individual computational methods. The genome-wide functional linkage maps depicted here represent functional linkages inferred by each of the individual computational methods. **(a)** Operon method (100bp threshold). **(b)** Rosetta Stone method. **(c)** Conserved Gene Neighbor method. **(d)** Phylogenetic Profile method
